# Supplementary material
Source: PubMed Central journal article supplement (PMC3702626)

Supplemental figure 1

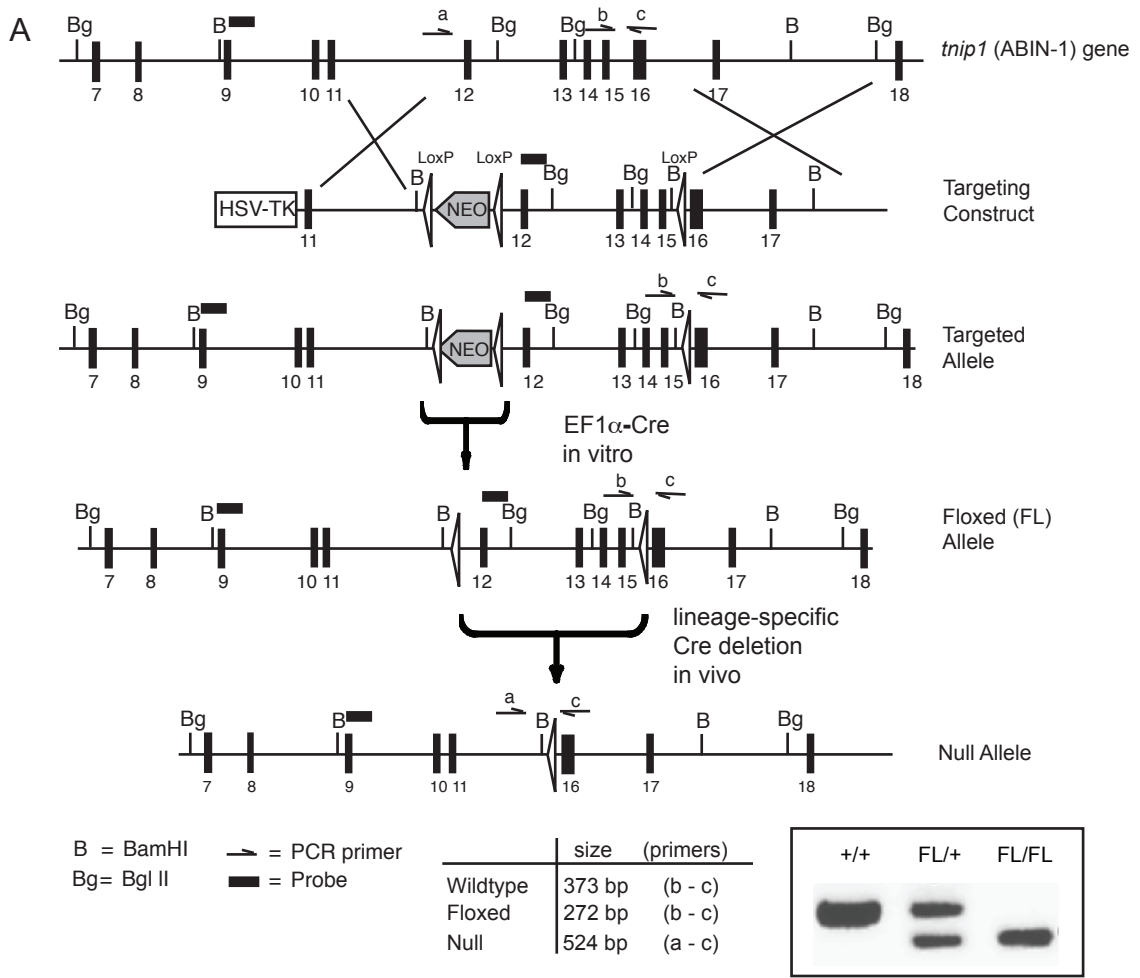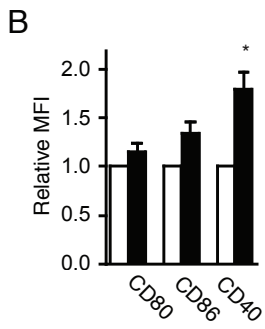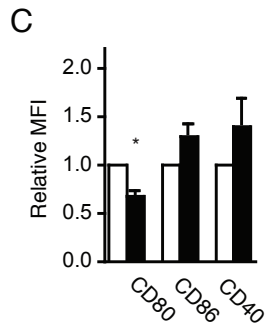

Supplement: NIHMS481951-supplement-2.pdf [file NIHMS481951-supplement-2.pdf]

Supplemental figure 2

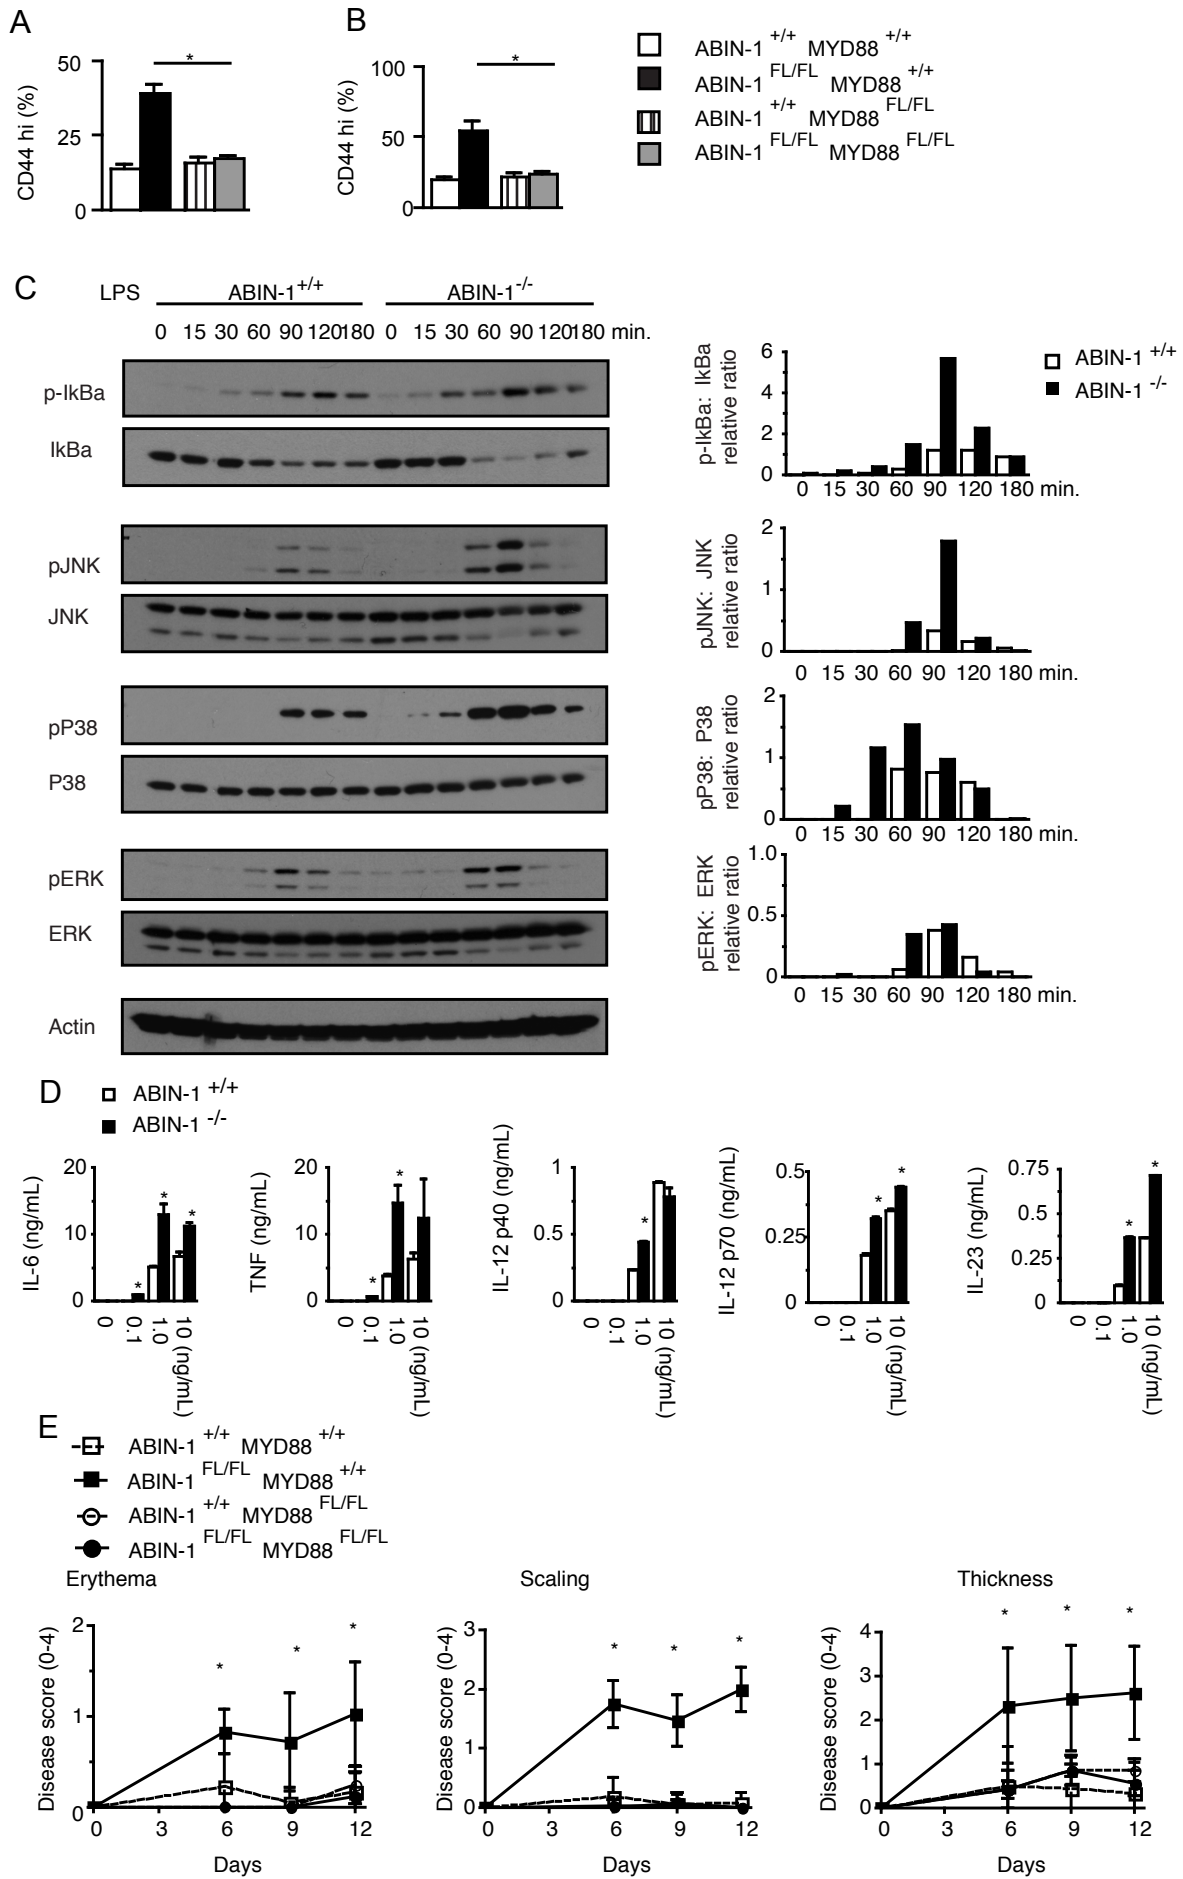

Supplement: NIHMS481951-supplement-3.pdf [file NIHMS481951-supplement-3.pdf]
